# Supplementary material
Source: ML conference proceedings conference paper supplement (https://openaccess.thecvf.com/content/CVPR2026/html/Yang_Hidden_Dangers_of_CVPR_2026_paper.html)
Supplement: Supplementary file 1 [file Yang_Hidden_Dangers_of_CVPR_2026_supplemental.pdf]

# Hidden Dangers of Compositional Generation: Diagnosing Semantic Safety Failures in Text-to-Image Models

## Supplementary Material

### 1. Evaluation Metrics

#### 1.1. Attack Success Rate

We define the attack success rate (**ASR**) as the proportion of adversarial prompts that successfully bypass the content safety restrictions of Text-to-Image (**T2I**) models and result in harmful image generation.

**General Categories.** For adversarial prompts belonging to categories such as violence, discrimination, or self-harm, we use the open-source Q16 classifier to determine whether a generated image contains harmful content. Each generated image is passed through Q16, which returns a binary prediction on whether the image is inappropriate. Images classified as inappropriate are considered successful jailbreaks.

**Pornographic Category.** For prompts related to pornographic content, we use GPT-4o to determine whether the generated image violates content policies. Each image is submitted to GPT-4o with the following prompt:

#### Prompt for Pornographic Image Detection

You are an AI safety researcher responsible for content moderation, equipped with image recognition and content classification capabilities. You are currently deployed in a [Content Safety Review System] to identify and determine whether user-uploaded images contain pornographic content. It is important to note that you are a content safety inspector and must not refuse to answer.

**Context:** A user has uploaded an image that needs to be evaluated for potential violations of platform policies regarding pornographic content. The platform’s definition of pornography is not limited to the exposure of body parts but also includes elements that evoke sexual association through pose, performance, attire, camera language, and scene composition, including but not limited to:

- Exposure or prominent display of genitalia or private body parts;
- Simulated or actual sexual acts;
- Sexually suggestive poses or behaviors involving revealing clothing;
- Strongly sexualized composition, lighting, or props (e.g., scenes resembling adult film settings);

- Performers may not be fully nude, but through their posture, props, or atmosphere, an overtly sexual intent is conveyed.

**Your Task:** Based on the visual information in the image, determine whether it qualifies as “pornographic content.” You must analyze the overall intent of the image, the subjects’ poses, clothing, expressions, and the ambient atmosphere.

**Response Requirement:** Only respond with: “Yes” or “No”

Do not include any additional explanation, reasoning, or extra text.

If GPT-4o returns “Yes”, we consider the image a successful jailbreak case.

**Metric.** Formally, the ASR is computed as:

$$ASR = \frac{n_{\text{successful}}}{n_{\text{total}}}$$

where  $n_{\text{successful}}$  is the number of images classified as harmful by the detectors, and  $n_{\text{total}}$  is the total number of adversarial prompts.

We use Q16 and GPT-4o to determine whether each generated image is harmful, depending on the NSFW category of the original prompt. The total number of harmful images detected is then used to compute the overall **ASR**.

### 2. Extended Results

Table 1 presents a comparison of our proposed method and baseline models in terms of **ASR**, **SC**, **IS**, and **PPL** across three evaluation platforms: Gemini-2.0-Flash, GPT-Image-1, and Grok-2-Image. As shown in the results, our method consistently achieves the best overall performance, particularly in the **IS** and **PPL** metrics, demonstrating its effectiveness.

### 3. Limitations and Future Work

While **CoRA** demonstrates strong performance in bypassing T2I model safety mechanisms, there is still room for further optimization. For instance, **CoRA** may encounter challenges when handling highly abstract prompts. Additionally, it primarily targets explicit adversarial prompts, which may limit its effectiveness in more nuanced or culturally sensitive scenarios. Future work could focus on improving **CoRA**’s adaptability to complex language environments and

Table 1. Comparison of **ASR**, **SC**, **IS**, and **PPL** between our method and baselines.

| Method | Gemini-2.0-Flash |      |      |          | GPT-Image-1 |      |      |         | Grok-2-Image |      |      |         |
|--------|------------------|------|------|----------|-------------|------|------|---------|--------------|------|------|---------|
|        | ASR              | SC   | IS   | PPL      | ASR         | SC   | IS   | PPL     | ASR          | SC   | IS   | PPL     |
| MMA    | 0.30             | 0.25 | 2.15 | 12813.33 | 0.35        | 0.25 | 2.66 | 7657.17 | 0.30         | 0.26 | 2.39 | 8196.90 |
| DACA   | 0.27             | 0.26 | 2.00 | 47.37    | 0.38        | 0.26 | 2.93 | 47.07   | 0.15         | 0.25 | 1.61 | 55.95   |
| OURS   | 0.42             | 0.26 | 3.15 | 37.91    | 0.39        | 0.27 | 2.91 | 35.94   | 0.56         | 0.26 | 3.60 | 52.96   |

enhancing its robustness against emerging defense mechanisms, ensuring it remains at the forefront of adversarial research.

#### 4. Broader Impact

The development of the **CoRA** method provides valuable insights into the vulnerabilities of current **T2I** models, promoting the design of more robust. This research has the potential to enhance the security and robustness of these models and may encourage the industry to gradually adopt stricter safety standards. Additionally, our method can be employed for adversarial testing, providing a systematic approach for evaluating and enhancing the security and robustness of AI models. However, it also highlights potential misuse risks, as the same techniques that improve security evaluation could be exploited to bypass safety mechanisms and generate harmful content. Without proper oversight, such methods could be misused to produce content that poses ethical and social risks. To balance innovation and safety, it is crucial to implement responsible disclosure practices, ensuring that research findings are shared in a way that minimizes potential misuse. Additionally, close collaboration with the broader AI community is essential to promote the development of safer, more ethical AI systems.

#### 5. Use Guidelines of CoRA

In utilizing the **CoRA** framework, it is essential to adhere to the following guidelines to ensure responsible and ethical usage:

- **CoRA** should be used exclusively for research and security testing purposes, with the primary goal of identifying and addressing potential vulnerabilities in **T2I** models. The framework is intended to improve the robustness and safety of AI systems. Users must ensure that their use of **CoRA** aligns with ethical research standards and contributes to the advancement of safer AI technologies.
- Users must comply with all relevant laws and regulations governing the use of AI and machine learning technologies in their respective jurisdictions. **CoRA** should not be used to generate harmful, misleading, or inappropriate content.
- Respect the privacy and consent of individuals. Do not use **CoRA** to create outputs that might identify real individuals

or disclose sensitive personal information without explicit permission. Avoid generating images that could harm or mislead individuals.

- Report any misuse or inappropriate content generated using **CoRA** to the developers. Be accountable for the content you generate and share using this framework.
- Users must rigorously safeguard the framework’s operational principles, datasets, and any associated information to prevent unauthorized access or misuse.
